# Supplementary material
Source: PubMed Central journal article supplement (PMC6317601)
Supplement: ASN.2018050521SupplementaryData1.pdf [file ASN.2018050521SupplementaryData1.pdf]

## **Survival among Veterans obtaining Dialysis in VA and non-VA settings**

Virginia Wang, PhD<sup>1,2,3</sup>, Cynthia J. Coffman, PhD<sup>1,4</sup>, Karen M. Stechuchak, MS<sup>1</sup>, Theodore S.Z. Berkowitz, MS<sup>1</sup>, Paul L. Hebert, PhD<sup>5,6</sup>, David Edelman, MD<sup>1,3</sup>, Ann M. O'Hare, MD<sup>5,7</sup>, Susan Crowley, MD<sup>8,9</sup>, Hollis J. Weidenbacher, PhD<sup>1</sup>, Matthew L. Maciejewski, PhD<sup>1,2,3</sup>

<sup>1</sup> Health Services Research and Development, Durham Veterans Affairs Health Care System, Durham, NC

<sup>2</sup> Department of Population Health Sciences, Duke University School of Medicine, Durham, NC

<sup>3</sup> Division of General Internal Medicine, Department of Medicine, Duke University School of Medicine, Durham, NC

<sup>4</sup> Department of Biostatistics and Bioinformatics, Duke University School of Medicine, Durham, NC

<sup>5</sup> Center for Health Services Research in Older Adults, Puget Sound Health Care System, Seattle, WA

<sup>6</sup> Department of Health Services, School of Public Health, University of Washington, Seattle WA

<sup>7</sup> Department of Medicine, University of Washington, Seattle WA

<sup>8</sup> Renal Section, Medical Services, VA Connecticut Health Care System, West Haven, CT

<sup>9</sup> Department of Medicine, Section of Nephrology, Yale University School of Medicine, New Haven, CT

### Corresponding author

Virginia Wang, Ph.D.

Health Services Research and Development

Durham VA Health Care System (152)

508 Fulton St.

Durham, NC 27705

Email: [virginia.wang@va.gov](mailto:virginia.wang@va.gov)

Voice: (919) 668-1793

Fax: (919) 416-5836

### **Supplemental Materials: Table of Contents**

|                                                                                          |        |
|------------------------------------------------------------------------------------------|--------|
| Suppl Figure 1. Sampling Frame.....                                                      | p. 2-3 |
| Suppl Figure 2. Visualization of Veteran Dialysis Settings, by Quarter.....              | p. 4   |
| Suppl Figure 3. Visualization of Veteran Dual Dialysis Settings Sub-Cohort, by Quarter.. | p. 5   |
| Suppl Table 1. Full regression results, including sensitivity analyses.....              | p. 6-8 |

## Supplemental Figure 1. Sampling Frame

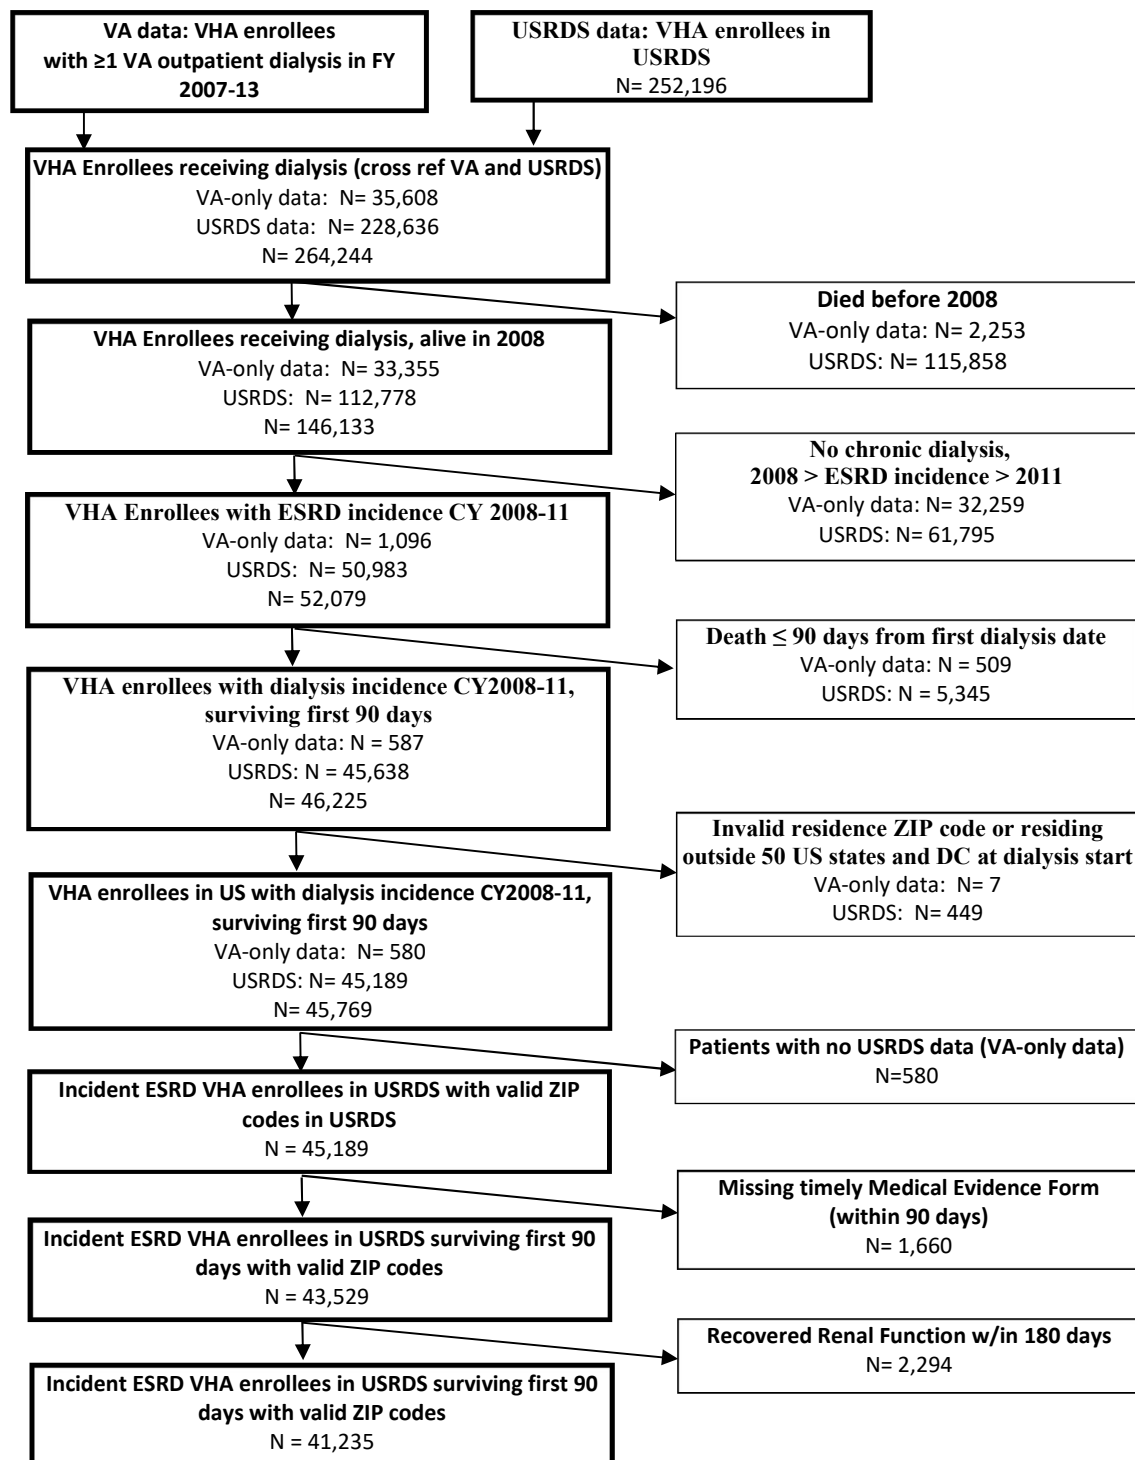

continued

## Sampling Frame (continued)

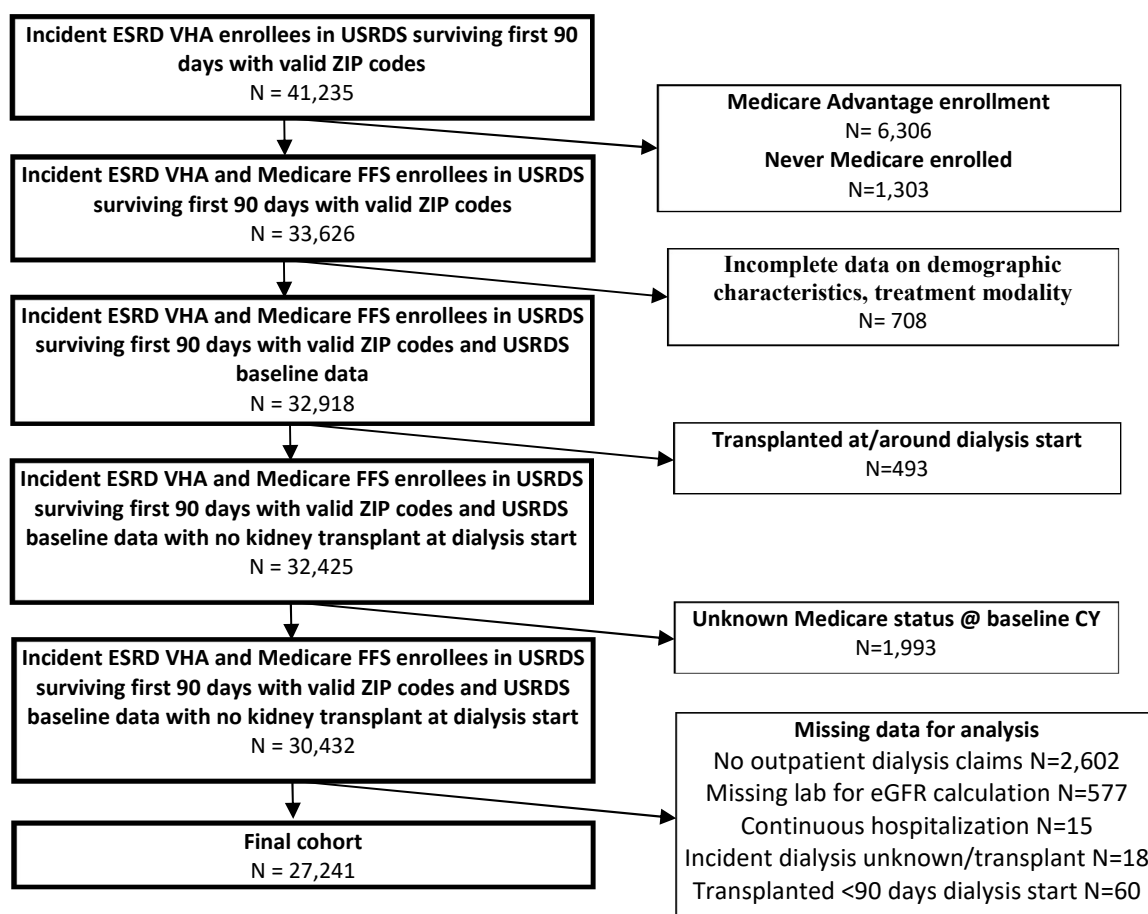

Abbreviations: Veterans Health Administration (VHA), US Renal Data System (USRDS), end-stage renal disease (ESRD), calendar year (CY), Medicare Fee-for-Service (Medicare FFS), estimated glomerular filtration rate (eGFR)

## Supplemental Figure 2. Visualization of Veteran Dialysis Settings, by Quarter

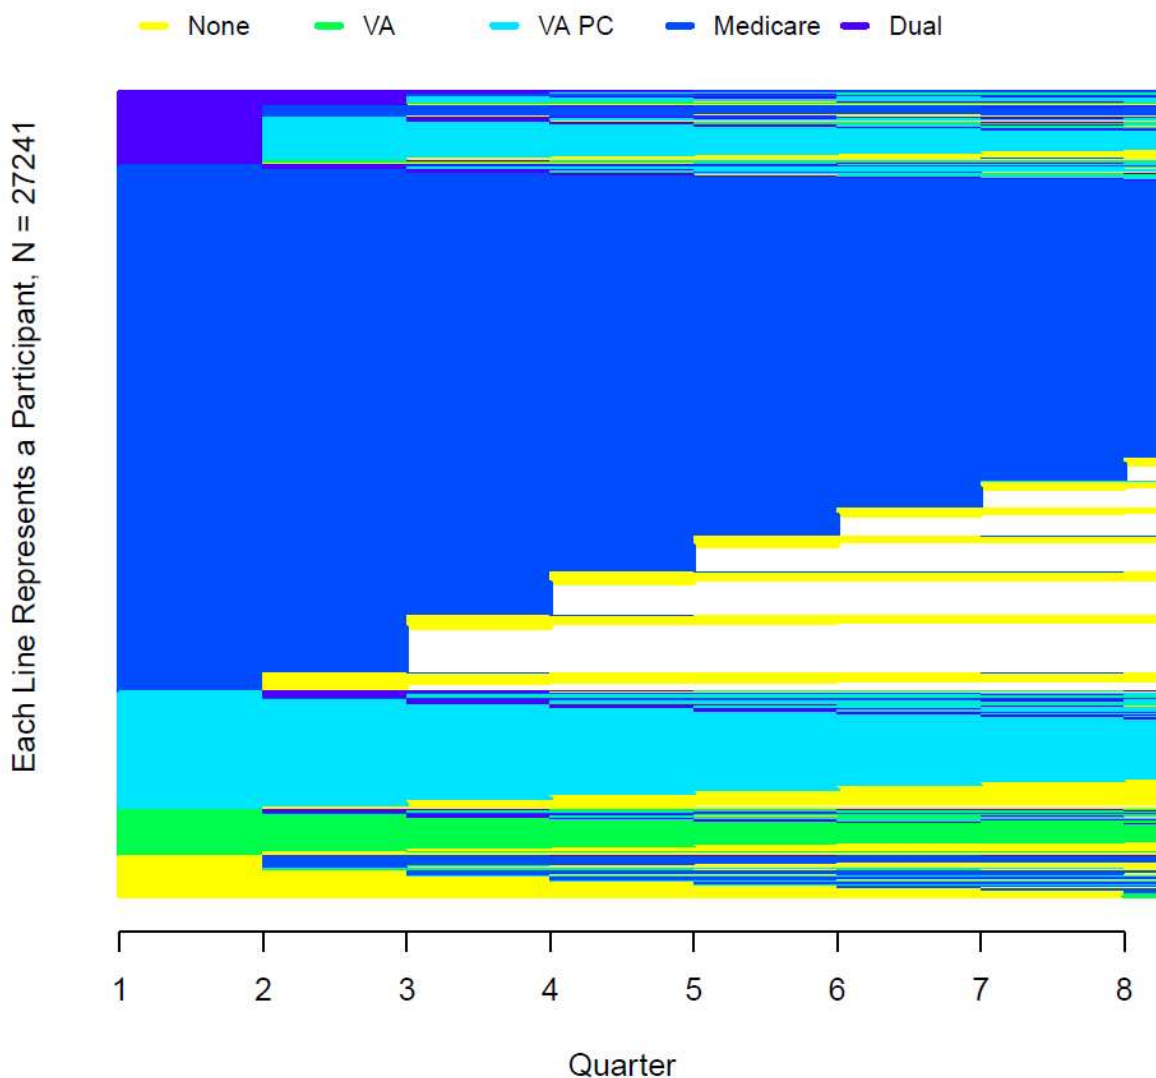

Abbreviation: VA Purchased Care (VA-PC)

Note: This figure illustrates the longitudinal pattern of dialysis setting for each Veteran in the study cohort, where each line represents a Veteran. Grouped together based on dialysis setting at initiation of maintenance dialysis, the lines describe general patterns of utilization over time as well as the extent of censoring (due to kidney transplantation or death). “None” dialysis setting refers to the absence of a VA, VA-PC or Medicare outpatient dialysis encounter/claim in the quarter, which may occur when patients are hospitalized.

### Supplemental Figure 3. Visualization of Veteran Dual Dialysis Settings Sub-Cohort, by Quarter

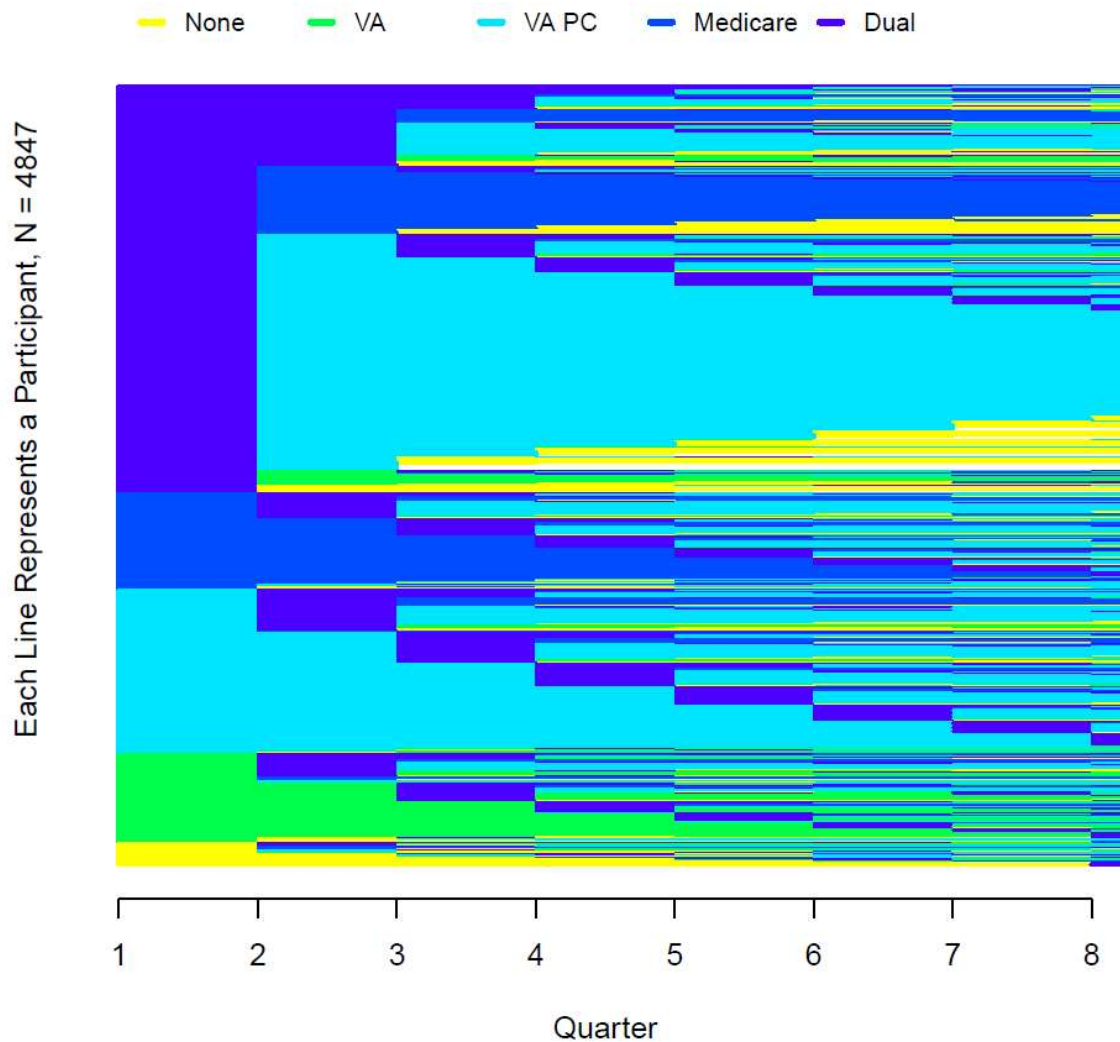

Abbreviation: VA Purchased Care (VA-PC)

Note: This figure illustrates the longitudinal pattern of dialysis setting for the subsample of Veterans in the study cohort categorized as receiving dialysis in Dual settings over the 2 years of follow-up observation period, where each line represents a Veteran. Grouped together based on dialysis setting at initiation of maintenance dialysis, the lines describe general patterns of utilization over time as well as the extent of censoring (due to kidney transplantation or death). “None” dialysis setting refers to the absence of a VA, VA-PC or Medicare outpatient dialysis encounter/claim in the quarter, which may occur when patients are hospitalized.



|                                            |       |       |      |        |  |      |      |      |        |  |      |      |       |        |
|--------------------------------------------|-------|-------|------|--------|--|------|------|------|--------|--|------|------|-------|--------|
| Distance $\geq$ 30 miles                   | 1.06  | 0.99  | 1.12 | 0.082  |  | 1.05 | 0.99 | 1.12 | 0.100  |  | 1.04 | 0.98 | 1.11  | 0.198  |
| Has nephrology service                     | 0.998 | 0.94  | 1.06 | 0.95   |  | 0.99 | 0.93 | 1.06 | 0.82   |  | 0.98 | 0.92 | 1.04  | 0.53   |
| Has dialysis unit                          | 0.96  | 0.91  | 1.01 | 0.128  |  | 0.95 | 0.90 | 1.01 | 0.082  |  | 0.94 | 0.89 | 0.995 | 0.031  |
|                                            |       |       |      |        |  |      |      |      |        |  |      |      |       |        |
| Nearest VA dialysis: Distance $\geq$ 30 mi | 0.96  | 0.89  | 1.03 | 0.23   |  | 0.96 | 0.89 | 1.03 | 0.26   |  | 0.99 | 0.92 | 1.06  | 0.72   |
| HD occupancy: 40-79% (ref)                 |       |       |      | 0.22   |  |      |      |      | 0.48   |  |      |      |       | 0.46   |
| 80-99%                                     | 0.97  | 0.92  | 1.02 | 0.23   |  | 0.98 | 0.93 | 1.03 | 0.41   |  | 0.97 | 0.92 | 1.02  | 0.22   |
| 100%                                       | 0.95  | 0.90  | 1.01 | 0.083  |  | 0.97 | 0.92 | 1.02 | 0.23   |  | 0.98 | 0.92 | 1.03  | 0.36   |
| <i>Insurance:</i>                          |       |       |      |        |  |      |      |      |        |  |      |      |       |        |
| Medicaid                                   | 1.12  | 1.06  | 1.19 | <0.001 |  | 1.12 | 1.05 | 1.19 | <0.001 |  | 1.13 | 1.07 | 1.20  | <0.001 |
| Medicare                                   | 1.79  | 1.53  | 2.09 | <0.001 |  | 1.85 | 1.58 | 2.16 | <0.001 |  | 1.88 | 1.61 | 2.19  | <0.001 |
| Employer-base                              | 0.96  | 0.90  | 1.02 | 0.20   |  | 0.91 | 0.85 | 0.97 | 0.003  |  | 0.88 | 0.82 | 0.93  | <0.001 |
| Other                                      | 0.91  | 0.86  | 0.95 | <0.001 |  | 0.91 | 0.86 | 0.95 | <0.001 |  | 0.92 | 0.88 | 0.96  | <0.001 |
| VA copayment required                      | 0.94  | 0.89  | 0.98 | 0.004  |  | 0.94 | 0.90 | 0.99 | 0.014  |  | 0.95 | 0.91 | 0.99  | 0.022  |
| VA reliance: 1-50% (ref)                   |       |       |      | 0.063  |  |      |      |      | <0.001 |  |      |      |       | <0.001 |
| >50-100%                                   | 0.97  | 0.90  | 1.04 | 0.35   |  | 0.92 | 0.85 | 0.99 | 0.025  |  | 0.90 | 0.84 | 0.96  | 0.002  |
| No VA or Medicare use                      | 0.83  | 0.71  | 0.97 | 0.022  |  | 0.70 | 0.60 | 0.82 | <0.001 |  | 0.70 | 0.60 | 0.82  | <0.001 |
| eGFR: <10 (ref)                            |       |       |      | <0.001 |  |      |      |      | <0.001 |  |      |      |       | <0.001 |
| $\geq$ 10-15                               | 1.10  | 1.05  | 1.15 | <0.001 |  | 1.08 | 1.03 | 1.13 | 0.001  |  | 1.09 | 1.04 | 1.14  | <0.001 |
| $\geq$ 15                                  | 1.27  | 1.21  | 1.35 | <0.001 |  | 1.25 | 1.18 | 1.32 | <0.001 |  | 1.23 | 1.16 | 1.30  | <0.001 |
| Body mass index: $\leq$ 18.5 (ref)         |       |       |      | <0.001 |  |      |      |      | <0.001 |  |      |      |       | <0.001 |
| 18.6-24                                    | 0.79  | 0.71  | 0.89 | <0.001 |  | 0.78 | 0.70 | 0.88 | <0.001 |  | 0.77 | 0.68 | 0.86  | <0.001 |
| 25-29                                      | 0.68  | 0.60  | 0.76 | <0.001 |  | 0.67 | 0.60 | 0.76 | <0.001 |  | 0.66 | 0.58 | 0.74  | <0.001 |
| $\geq$ 30                                  | 0.61  | 0.54  | 0.68 | <0.001 |  | 0.60 | 0.54 | 0.68 | <0.001 |  | 0.58 | 0.52 | 0.66  | <0.001 |
| Primary cause of ESRD: Diabetes (ref)      |       |       |      | <0.001 |  |      |      |      | <0.001 |  |      |      |       | <0.001 |
| Hypertension                               | 0.98  | 0.92  | 1.03 | 0.38   |  | 0.98 | 0.92 | 1.03 | 0.37   |  | 0.98 | 0.93 | 1.04  | 0.49   |
| Glomerulonephritis                         | 0.83  | 0.74  | 0.93 | <0.001 |  | 0.82 | 0.74 | 0.92 | 0.001  |  | 0.81 | 0.72 | 0.91  | <0.001 |
| Other/Uncertain                            | 1.17  | 1.10  | 1.25 | <0.001 |  | 1.13 | 1.06 | 1.21 | <0.001 |  | 1.09 | 1.03 | 1.16  | 0.006  |
| <i>Prior healthcare utilization:</i>       |       |       |      |        |  |      |      |      |        |  |      |      |       |        |
| Pre-ESRD nephrology                        | 0.84  | 0.78  | 0.90 | <0.001 |  | 0.88 | 0.82 | 0.95 | 0.001  |  | 0.91 | 0.84 | 0.98  | 0.008  |
| Kidney transplant                          | 0.88  | 0.74  | 1.05 | 0.151  |  | 0.91 | 0.77 | 1.08 | 0.28   |  | 0.94 | 0.79 | 1.11  | 0.47   |
| Dialysis initiated during hospitalization  | 1.10  | 1.05  | 1.15 | <0.001 |  | 1.10 | 1.05 | 1.15 | <0.001 |  | 1.11 | 1.05 | 1.16  | <0.001 |
| Hospitalization                            | 1.05  | 0.998 | 1.11 | 0.059  |  | 1.05 | 1.00 | 1.11 | 0.042  |  | 1.06 | 1.01 | 1.12  | 0.027  |
| Institutionalization                       | 1.17  | 1.11  | 1.24 | <0.001 |  | 1.16 | 1.10 | 1.22 | <0.001 |  | 1.13 | 1.07 | 1.19  | <0.001 |
| Hospice                                    | 1.51  | 1.26  | 1.82 | <0.001 |  | 1.46 | 1.22 | 1.76 | <0.001 |  | 1.41 | 1.17 | 1.70  | <0.001 |
| Incident Dialysis: Home-HD or PD           | 1.10  | 0.94  | 1.30 | 0.25   |  | 1.09 | 0.93 | 1.28 | 0.29   |  | 1.06 | 0.90 | 1.25  | 0.46   |
| Vascular access type: AVF/G (ref)          |       |       |      | <0.001 |  |      |      |      | <0.001 |  |      |      |       | <0.001 |
| Catheter                                   | 1.52  | 1.43  | 1.61 | <0.001 |  | 1.47 | 1.39 | 1.56 | <0.001 |  | 1.44 | 1.36 | 1.53  | <0.001 |
| Other/Unknown                              | 1.16  | 0.98  | 1.38 | 0.093  |  | 1.13 | 0.95 | 1.34 | 0.171  |  | 1.10 | 0.93 | 1.31  | 0.26   |

| <i>Comorbid conditions:</i>    |      |      |      |        |  |      |       |      |        |  |      |       |      |        |
|--------------------------------|------|------|------|--------|--|------|-------|------|--------|--|------|-------|------|--------|
| Diabetes                       | 1.06 | 1.01 | 1.12 | 0.033  |  | 1.05 | 0.998 | 1.11 | 0.0618 |  | 1.06 | 1.00  | 1.11 | 0.046  |
| Hypertension                   | 0.86 | 0.82 | 0.90 | <0.001 |  | 0.87 | 0.82  | 0.91 | <0.001 |  | 0.85 | 0.81  | 0.90 | <0.001 |
| Congestive heart failure       | 1.26 | 1.20 | 1.32 | <0.001 |  | 1.27 | 1.21  | 1.34 | <0.001 |  | 1.29 | 1.23  | 1.36 | <0.001 |
| Chronic pulmonary              | 1.18 | 1.13 | 1.23 | <0.001 |  | 1.18 | 1.13  | 1.24 | <0.001 |  | 1.20 | 1.14  | 1.25 | <0.001 |
| Peripheral vascular disease    | 1.05 | 1.01 | 1.10 | 0.026  |  | 1.05 | 0.999 | 1.09 | 0.057  |  | 1.03 | 0.99  | 1.08 | 0.150  |
| Mental health diagnosis        | 1.09 | 1.04 | 1.14 | <0.001 |  | 1.09 | 1.04  | 1.14 | <0.001 |  | 1.09 | 1.04  | 1.14 | <0.001 |
| Hepatitis                      | 0.98 | 0.86 | 1.10 | 0.69   |  | 0.99 | 0.88  | 1.12 | 0.90   |  | 1.00 | 0.89  | 1.13 | 0.95   |
| Anemia                         | 0.97 | 0.93 | 1.01 | 0.126  |  | 0.98 | 0.94  | 1.02 | 0.38   |  | 1.00 | 0.96  | 1.05 | 0.90   |
| Arrhythmias                    | 1.19 | 1.14 | 1.24 | <0.001 |  | 1.18 | 1.13  | 1.24 | <0.001 |  | 1.18 | 1.13  | 1.23 | <0.001 |
| Cerebrovascular disease        | 1.04 | 0.98 | 1.09 | 0.21   |  | 1.03 | 0.98  | 1.09 | 0.26   |  | 1.03 | 0.98  | 1.09 | 0.30   |
| Coagulopathy                   | 1.15 | 1.09 | 1.22 | <0.001 |  | 1.15 | 1.08  | 1.21 | <0.001 |  | 1.14 | 1.08  | 1.21 | <0.001 |
| Dementia                       | 1.08 | 0.97 | 1.22 | 0.173  |  | 1.08 | 0.96  | 1.21 | 0.220  |  | 1.09 | 0.97  | 1.22 | 0.152  |
| Electrolytes                   | 1.05 | 1.01 | 1.10 | 0.028  |  | 1.06 | 1.01  | 1.11 | 0.019  |  | 1.06 | 1.01  | 1.11 | 0.012  |
| Hemiplegia                     | 0.86 | 0.72 | 1.02 | 0.078  |  | 0.87 | 0.73  | 1.03 | 0.100  |  | 0.88 | 0.74  | 1.05 | 0.153  |
| Human immunodeficiency virus   | 1.26 | 0.95 | 1.66 | 0.108  |  | 1.22 | 0.92  | 1.62 | 0.161  |  | 1.14 | 0.86  | 1.51 | 0.37   |
| Ischemic heart disease         | 1.04 | 0.99 | 1.09 | 0.150  |  | 1.03 | 0.98  | 1.08 | 0.21   |  | 1.05 | 0.995 | 1.10 | 0.079  |
| Liver or mild liver disease    | 1.37 | 1.23 | 1.51 | <0.001 |  | 1.31 | 1.19  | 1.46 | <0.001 |  | 1.32 | 1.19  | 1.46 | <0.001 |
| Metastatic cancer              | 2.05 | 1.83 | 2.30 | <0.001 |  | 2.00 | 1.78  | 2.24 | <0.001 |  | 2.00 | 1.78  | 2.24 | <0.001 |
| Other cancer/any tumor         | 1.19 | 1.13 | 1.25 | <0.001 |  | 1.19 | 1.13  | 1.26 | <0.001 |  | 1.17 | 1.12  | 1.24 | <0.001 |
| Myocardial infarction          | 1.07 | 1.02 | 1.12 | 0.011  |  | 1.07 | 1.02  | 1.13 | 0.005  |  | 1.08 | 1.03  | 1.14 | 0.002  |
| Other neurological disorders   | 1.14 | 1.08 | 1.22 | <0.001 |  | 1.13 | 1.06  | 1.20 | <0.001 |  | 1.13 | 1.06  | 1.20 | <0.001 |
| Paralysis                      | 1.12 | 0.99 | 1.26 | 0.069  |  | 1.12 | 0.99  | 1.26 | 0.075  |  | 1.10 | 0.98  | 1.24 | 0.119  |
| Pulmonary-circulatory disorder | 1.05 | 0.98 | 1.11 | 0.166  |  | 1.05 | 0.99  | 1.12 | 0.123  |  | 1.05 | 0.99  | 1.12 | 0.101  |
| Rheumatoid disease             | 1.17 | 1.04 | 1.33 | 0.012  |  | 1.16 | 1.03  | 1.32 | 0.018  |  | 1.17 | 1.03  | 1.32 | 0.016  |
| Hypothyroidism                 | 1.10 | 1.04 | 1.16 | 0.001  |  | 1.11 | 1.05  | 1.17 | <0.001 |  | 1.12 | 1.06  | 1.18 | <0.001 |
| Ulcer disease                  | 1.11 | 1.01 | 1.22 | 0.025  |  | 1.12 | 1.02  | 1.23 | 0.015  |  | 1.12 | 1.03  | 1.23 | 0.013  |
| Valvular disease               | 1.17 | 1.11 | 1.23 | <0.001 |  | 1.17 | 1.11  | 1.23 | <0.001 |  | 1.18 | 1.12  | 1.24 | <0.001 |
| Weight loss                    | 1.11 | 1.05 | 1.18 | <0.001 |  | 1.09 | 1.02  | 1.16 | 0.009  |  | 1.06 | 0.995 | 1.13 | 0.074  |
| Inability to ambulate/transfer | 1.40 | 1.30 | 1.50 | <0.001 |  | 1.38 | 1.29  | 1.48 | <0.001 |  | 1.35 | 1.26  | 1.44 | <0.001 |
| Amputation                     | 1.19 | 1.07 | 1.33 | 0.001  |  | 1.18 | 1.06  | 1.31 | 0.003  |  | 1.22 | 1.10  | 1.36 | <0.001 |

Abbreviations: Reference group (ref), VA purchased care (VA-PC), end-stage renal disease (ESRD), estimated glomerular filtration rate (eGFR), hemodialysis (HD), peritoneal dialysis (PD), arterial venous fistula/graft (AVF/G)

Note: In the time invariant model, the Dual setting category (within and across quarters) has n=4,847 Veterans; the time-varying Dual setting (within quarter) consists of n=4,687 Veterans that have at least one quarter with Dual setting.
